# Supplementary material
Source: publisher site journal article supplement (https://www.e-cmh.org/upload/media/cmh-2023-0422-Supplementary-Table-1.pdf)
Supplement: Supplementary file 1 [file cmh-2023-0422-Supplementary-Table-1.pdf]

**Supplementary Table 1.** Division of AIDS (DAIDS) table for grading the severity of adverse events

| Parameter                                                            | Grade 1<br>(mild)                                                                                                            | Grade 2<br>(moderate)                                                                                                               | Grade 3<br>(severe)                                                                                                                | Grade 4<br>(potentially life-threatening)                                                                                                                                                 |
|----------------------------------------------------------------------|------------------------------------------------------------------------------------------------------------------------------|-------------------------------------------------------------------------------------------------------------------------------------|------------------------------------------------------------------------------------------------------------------------------------|-------------------------------------------------------------------------------------------------------------------------------------------------------------------------------------------|
| Clinical adverse event NOT identified elsewhere in the grading table | Mild symptoms causing no or minimal interference with usual social and functional activities with intervention not indicated | Moderate symptoms causing greater than minimal interference with usual social and functional activities with intervention indicated | Severe symptoms causing inability to perform usual social and functional activities with intervention or hospitalization indicated | Potentially life-threatening symptoms causing inability to perform basic self-care functions with intervention indicated to prevent permanent impairment, persistent disability, or death |
| AST and ALT elevations                                               | 1.25 to <2.5× ULN                                                                                                            | 2.5 to <5.0× ULN                                                                                                                    | 5.0 to <10.0× ULN                                                                                                                  | ≥10.0× ULN                                                                                                                                                                                |

ALT, alanine aminotransferase; AST, aspartate aminotransferase; ULN, upper limit of normal.
